# Supplementary material for: Artificial leaf structures as a UV detector formed by the self-assembly of ZnO nanoparticles
Source: Royal Society of Chemistry journal article supplement (doi:10.1039/c3nr33748k), 2013-01-01
Supplement: c3nr33748k.pdf [file c3nr33748k.pdf]

## Supporting Information

# Artificial leaf structure for UV detector formed by the self-assembly ZnO nanoparticles

5      *Fei Wang<sup>1,2</sup>, Dongxu Zhao<sup>1\*</sup>, Zhen Guo<sup>1,2</sup>, Lei Liu<sup>1</sup>, Zhenzhong Zhang<sup>1</sup> and Dezhen Shen<sup>1</sup>*

1 State key laboratory of luminescence and applications, Changchun Institute of Optics, Fine  
Mechanics and Physics, Chinese Academy of Sciences, 3888 Dongnanhu Road, Changchun 130021,  
People's Republic of China

2 Graduate School of the Chinese Academy of Sciences, Beijing 100049, People's Republic of China

10

15

20

25

30

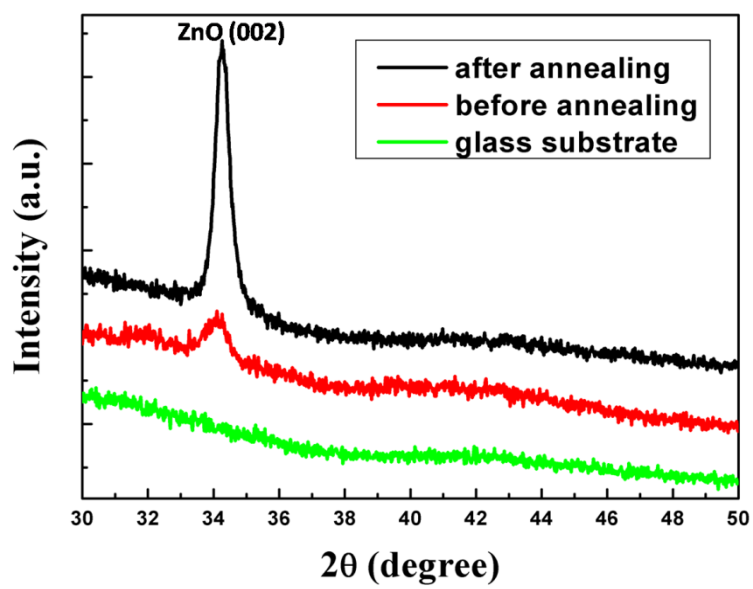

Fig. S1 XRD patterns of the artificial leaf structure before and after annealing.

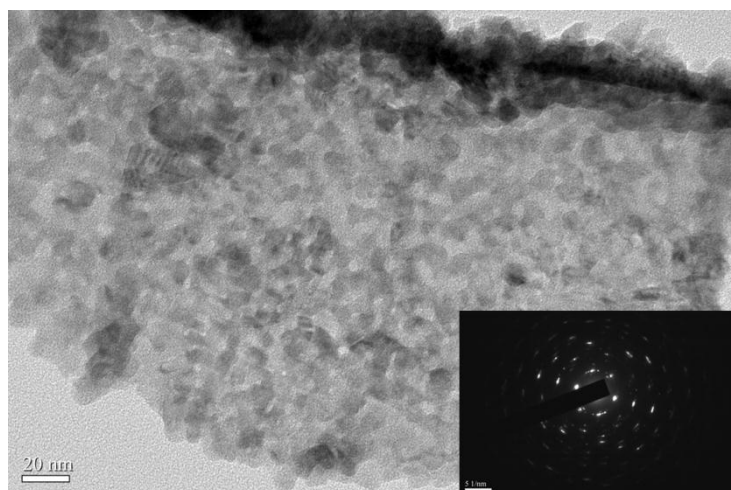

**Fig. S2** TEM image of the structure after annealing, insert is the SAED pattern of the sample.
